# Supplementary material for: Generation and characterization of humanization CD4 knock-in mice expressing chimeric mouse/human CD4 protein
Source: Research Square preprint supplement (doi:10.21203/rs.3.rs-4299701/v1), 2024-05-22
Supplement: Supplementary file 1 [file 827fab2e6100fe8afa468a61.xlsx]

## Sheet: Antibody
Antibodies for thymus Fig. 2
Antibody	Coupled Fluorochrome	Clone	Supplier Name	Catalog Number
anti-mouse CD4(domain1)	FITC	GK1.5	BioLegend	100406
anti-mouse CD4(domain3)	Pacific Blue	RM4-4	BioLegend	116008
anti-human CD4(domain1)	BV605	RPA-TA	BioLegend	300556
anti-mouse CD8a	AF700	53-6.7	BioLegend	100729
anti-human/mouse CD44	BV711	IM7	BioLegend	103057
anti-mouse CD25	BV421	PC61	BioLegend	102043
LIVE/DEAD™ Fixable Near-IR Dead Cell Stain Kit	LIVE/DEAD™ Fixable Near-IR Dead Cell Stain Kit	N/A	Invitrogen/ThermoFisher	L34975
Antibodies for spleen/blood Fig. 1E and Fig. 5
Antibody	Coupled Fluorochrome	Clone	Supplier Name	Catalog Number
anti-mouse CD3	PerCP/Cy5.5	17A2	BioLegend	100217
anti-mouse CD4(domain1)	FITC	GK1.5	BioLegend	100406
anti-mouse CD4 (domain3)	Pacific Blue	RM4-4	BioLegend	116008
anti-human CD4(domain1)	BV605	RPA-TA	BioLegend	300556
anti-mouse CD8a	AF700	53-6.7	BioLegend	100729
anti-mouse CD19	BV510	6D5	BioLegend	115545
anti-human/mouse CD44	BV711	IM7	BioLegend	103057
anti-mouse CD62L	BV785	MEL-14	BioLegend	104440
LIVE/DEAD™ Fixable Near-IR Dead Cell Stain Kit	LIVE/DEAD™ Fixable Near-IR Dead Cell Stain Kit	N/A	Invitrogen/ThermoFisher	L34975
Antibodies for splenocytes stimulation Fig. 6
Antibody	Coupled Fluorochrome	Clone	Supplier Name	Catalog Number
7-AAD vibility Staining Solution	7-AAD	N/A	BioLegend	420403
CFSE Cell Division Tracker Kit	CFSE	N/A	BioLegend	423801
anti-mouse CD25	APC	PC61	BioLegend	102011
anti-human/mouse CD44	APC/Cy7	IM7	BioLegend	103035
anti-mouse CD4(domain3)	Pacific Blue	RM4-4	BioLegend	116008
anti-mouse CD8a	BV711	53.6.7	BioLegend	100747

## Sheet: Fig 1C-D.
	Fig 1D. Relative B2m expression
	mCD4-D1			hCD4-D1
	CD4m/m	CD4m/h	CD4h/h	CD4m/m	CD4m/h	CD4h/h
	0.00643646	0.00360651	7.44238e-05	0.000107899	0.0128949	0.00457002
	0.00953837	0.00425239	5.60396e-05	4.28137e-05	0.00972854	0.00591717
	0.00561436	0.00168706	6.77049e-05	2.36132e-05	0.0113524	0.00222215
	0.00528493	0.00360728	6.77515e-05	2.31083e-05	0.00850121	0.00493729
Mean	0.00671853	0.00328831	6.64799e-05	4.93585e-05	0.0106193	0.00441166
SD	0.00194126	0.00111002	7.64249e-06	4.00903e-05	0.00191446	0.00156651
	Fig 1E. MFI
	mCD4-D1			hCD4-D1
	CD4m/m	CD4m/h	CD4h/h	CD4m/m	CD4m/h	CD4h/h
	60371	29700	2029	969	17949	32850
	59262	29700	2007	798	16245	35314
	58174	26208	2217	881	14218	35743
	55620	30395	2069	838	17253	32068
	50860	30552	2074	759	15441	32771
	49156	30788	1189	770	14850	35571
	50727	30552	2170	740	16858	32146
Mean	54881.4	29699.3	1965	822.143	16116.3	33780.4
SD	4599.33	1597.53	350.3	80.9515	1346.64	1678.2

## Sheet: Fig 3. CBC
	Fig 3. CBC
	RBC(M/uL)				HGB(g/dL)				HCT(%)
	CD4m/m	CD4m/h	CD4h/h		CD4m/m	CD4m/h	CD4h/h		CD4m/m	CD4m/h	CD4h/h
	10.49	9.51	10.24		15.3	14.2	15.3		55.1	47.6	52
	9.29	10.32	10.13		13.8	15.3	15.2		47.3	52.3	52.2
	10.51	9.78	10.42		15.5	14.9	15.8		52.5	50.2	54.9
	10.17	10.02	10.07		15.4	15	15.5		52.9	51.9	52.4
	10.03	10.27	10.66		14.9	15.5	16.2		51.1	53	56.7
	9.27	10.2	10.26		14.5	15.7	15.3		48.2	53.5	52.9
	10.15	9.81	10.48		15.4	14.6	15.7		51.8	49.9	53.3
	10.23	10.12	9.09		15.5	15.4	14.2		52.5	51.3	47.4
	MCV(fL)				MCH(pg)				MCHC(g/dL)
	CD4m/m	CD4m/h	CD4h/h		CD4m/m	CD4m/h	CD4h/h		CD4m/m	CD4m/h	CD4h/h
	52.5	50.1	50.8		14.6	14.9	14.9		27.8	29.8	29.4
	50.9	50.7	51.5		14.9	14.8	15		29.2	29.3	29.1
	50	51.3	52.7		14.7	15.2	15.2		29.5	29.7	28.8
	52	51.8	52		15.1	15	15.4		29.1	28.9	29.6
	50.9	51.6	53.2		14.9	15.1	15.2		29.2	29.2	28.6
	52	52.5	51.6		15.6	15.4	14.9		30.1	29.3	28.9
	51	50.9	50.9		15.2	14.9	15		29.7	29.3	29.5
	51.3	50.7	52.1		15.2	15.2	15.6		29.5	30	30
	RET(K/uL)				RET(%)				PLT(K/uL)
	CD4m/m	CD4m/h	CD4h/h		CD4m/m	CD4m/h	CD4h/h		CD4m/m	CD4m/h	CD4h/h
	363	461.2	398.3		3.46	4.85	3.89		735	698	907
	515.6	384.9	386		5.55	3.73	3.81		637	917	851
	359.4	370.7	339.7		3.42	3.79	3.26		824	662	927
	350.9	621.2	315.2		3.45	6.2	3.13		843	678	693
	351.1	315.3	337.9		3.5	3.07	3.17		897	764	715
	424.6	377.4	414.5		4.58	3.7	4.04		373	837	739
	329.9	554.3	402.4		3.25	5.65	3.84		673	736	901
	327.4	367.4	398.1		3.2	3.63	4.38		295	634	555
	WBC(K/uL)				NEUT(K/uL)				LYMPH(K/uL)
	CD4m/m	CD4m/h	CD4h/h		CD4m/m	CD4m/h	CD4h/h		CD4m/m	CD4m/h	CD4h/h
	7.42	9.33	5.18		0.8	0.91	1.09		6.42	8.12	3.9
	7.09	7	6.72		0.58	0.7	0.48		6.22	6.03	6.02
	8.02	6.11	5.65		1.1	0.65	0.64		6.65	5.32	4.85
	6.42	8.46	8.41		0.89	1.03	1.12		5.24	7.02	6.96
	7.12	5.59	7.35		1.22	0.9	0.64		5.59	4.48	6.17
	7.54	5.47	9.08		0.66	0.44	0.74		6.52	4.26	8.09
	7.47	9.83	7.6		0.6	0.6	0.59		6.65	8.96	6.74
	7.61	3.73	5.74		0.62	0.44	0.46		6.78	3.1	4.97
	MONO(K/uL)				EO(K/uL)				BASO(K/uL)
	CD4m/m	CD4m/h	CD4h/h		CD4m/m	CD4m/h	CD4h/h		CD4m/m	CD4m/h	CD4h/h
	0.1	0.14	0.11		0.09	0.14	0.07		0.01	0.02	0.01
	0.15	0.1	0.13		0.12	0.16	0.08		0.02	0.01	0.01
	0.19	0.08	0.09		0.08	0.05	0.07		0	0.01	0
	0.13	0.24	0.21		0.15	0.16	0.12		0.01	0.01	0
	0.23	0.11	0.41		0.07	0.08	0.12		0.01	0.02	0.01
	0.17	0.72	0.16		0.18	0.05	0.08		0.01	0	0.01
	0.12	0.16	0.1		0.09	0.1	0.16		0.01	0.01	0.01
	0.11	0.13	0.1		0.09	0.05	0.19		0.01	0.01	0.02
	p-value (m/m vs. m/h)		0.6702		p-value (m/m vs. m/h)		0.8939		p-value (m/m vs. m/h)		0.9113
	p-value (m/m vs. h/h)		0.9788		p-value (m/m vs. h/h)		0.993		p-value (m/m vs. h/h)		0.9113
	p-value (m/h vs. h/h)		0.7868		p-value (m/h vs. h/h)		0.8398		p-value (m/h vs. h/h)		0.6932
	NEUT(%)				LYMPH(%)				MONO(%)
	CD4m/m	CD4m/h	CD4h/h		CD4m/m	CD4m/h	CD4h/h		CD4m/m	CD4m/h	CD4h/h
	10.9	9.8	21		86.5	87	75.3		1.3	1.5	2.1
	8.2	10	7.2		87.7	86.1	89.6		2.1	1.4	1.9
	13.7	10.6	11.4		82.9	87.1	85.8		2.4	1.3	1.6
	13.9	12.2	13.3		81.6	83	82.8		2	2.8	2.5
	17.2	16.1	8.8		78.5	80.1	83.9		3.2	2	5.6
	8.7	8	8.1		86.5	77.9	89.1		2.3	13.2	1.8
	8.1	6.2	7.8		89	91.1	88.7		1.6	1.6	1.3
	8.2	11.8	8.1		89.1	83.1	86.6		1.4	3.5	1.7
	p-value (m/m vs. m/h)		0.9579		p-value (m/m vs. m/h)		0.9259		p-value (m/m vs. m/h)		0.5203
	p-value (m/m vs. h/h)		0.9753		p-value (m/m vs. h/h)		>0.9999		p-value (m/m vs. h/h)		0.9734
	p-value (m/h vs. h/h)		0.9976		p-value (m/h vs. h/h)		0.9259		p-value (m/h vs. h/h)		0.655
	EO(%)				BASO(%)
	CD4m/m	CD4m/h	CD4h/h		CD4m/m	CD4m/h	CD4h/h
	1.2	1.5	1.4		0.1	0.2	0.2
	1.7	2.3	1.2		0.3	0.1	0.1
	1	0.8	1.2		0	0.2	0
	2.3	1.9	1.4		0.2	0.1	0
	1	1.4	1.6		0.1	0.4	0.1
	2.4	0.9	0.9		0.1	0	0.1
	1.2	1	2.1		0.1	0.1	0.1
	1.2	1.3	3.3		0.1	0.3	0.3
	p-value (m/m vs. m/h)		0.9307		p-value (m/m vs. m/h)		0.623
	p-value (m/m vs. h/h)		0.8984		p-value (m/m vs. h/h)		0.9702
	p-value (m/h vs. h/h)		0.7049		p-value (m/h vs. h/h)		0.4821

## Sheet: Fig 4D-E.
	Fig 4D. % T cells in Thymus (% of Thymocytes)
	DN			DP			CD4 SP			CD8 SP
	CD4m/m	CD4m/h	CD4h/h	CD4m/m	CD4m/h	CD4h/h	CD4m/m	CD4m/h	CD4h/h	CD4m/m	CD4m/h	CD4h/h
	1.78	2.61	3.41	85.8	84.1	82.2	5.54	4.5	5.29	1.79	2.3	3.22
	2.25	2.82	3.41	84.1	81.3	86.2	6.35	6.35	3.34	2.1	3.38	1.98
	1.91	3.32	4.55	82.7	85.5	83.5	7.51	4.25	4.27	2.2	1.84	2.31
	2.01	3.38	3.65	84.6	83.9	84.3	6.05	4.99	3.94	2.04	2.17	2.42
	2.05	2.19	2	87.6	85.4	83.8	4	4.92	5.12	1.48	2.23	3.12
	2.08	3.21	2.34	86.8	83.9	85.1	4.68	5.27	4.2	1.4	2.05	2.39
	1.68	2.57	2.49	87.4	86.3	85.3	4.86	4.39	4.36	1.4	1.81	2.52
Mean	1.96571	2.87143	3.12143	85.5714	84.3429	84.3429	5.57	4.95286	4.36	1.77286	2.25429	2.56571
SD	0.192428	0.447341	0.890102	1.84275	1.63285	1.32521	1.18071	0.715419	0.66995	0.347597	0.530373	0.446835
	p-value (m/m vs. m/h)		0.0033	p-value (m/m vs. m/h)		0.3501	p-value (m/m vs. m/h)		0.4116	p-value (m/m vs. m/h)		0.1382
	p-value (m/m vs. h/h)		0.0332	p-value (m/m vs. h/h)		0.3501	p-value (m/m vs. h/h)		0.0497	p-value (m/m vs. h/h)		0.0103
	p-value (m/h vs. h/h)		0.8779	p-value (m/h vs. h/h)		>0.9999	p-value (m/h vs. h/h)		0.4393	p-value (m/h vs. h/h)		0.4128
	Fig 4E. % DN cells in Thymus (% of Thymocytes)
	DN1			DN2			DN3			DN4
	CD4m/m	CD4m/h	CD4h/h	CD4m/m	CD4m/h	CD4h/h	CD4m/m	CD4m/h	CD4h/h	CD4m/m	CD4m/h	CD4h/h
	9.82	7.32	6.23	35.9	22.3	15.6	22.8	17.2	22.7	31.4	53.2	55.4
	6.28	7.04	7.23	36.7	33.3	3.3	29	26.5	12.8	28	33.1	76.7
	6.77	3.84	4.41	34.1	19.1	11.8	36.3	24.4	16.7	22.8	52.7	67.1
	7.04	6.67	3.98	22.6	16.5	15.3	30	19.3	23	40.3	57.6	57.7
	4.8	7.25	8.54	20.2	22.7	35.6	28.9	33.4	32.2	46.1	36.5	23.6
	4.37	4.97	7.46	24.1	20.8	27.9	32.2	15.7	27.4	39.3	58.6	37.2
	7.21	4.8	5.47	26.7	29.1	31.6	33.6	24.1	23.69	32.4	42	39.2
Mean	6.61286	5.98429	6.18857	28.6143	23.4	20.1571	30.4	22.9429	22.6414	34.3286	47.6714	50.9857
SD	1.79244	1.41422	1.6728	6.82604	5.84608	11.7455	4.28991	6.11252	6.42127	8.00202	10.3534	18.549
	p-value (m/m vs. m/h)		0.7552	p-value (m/m vs. m/h)		0.5014	p-value (m/m vs. m/h)		0.0607	p-value (m/m vs. m/h)		0.1661
	p-value (m/m vs. h/h)		0.8789	p-value (m/m vs. h/h)		0.1812	p-value (m/m vs. h/h)		0.05	p-value (m/m vs. h/h)		0.0703
	p-value (m/h vs. h/h)		0.9703	p-value (m/h vs. h/h)		0.7605	p-value (m/h vs. h/h)		0.9946	p-value (m/h vs. h/h)		0.8847

## Sheet: Fig 5D-H
	Fig 5D								Fig 5D
	% mCD3+ cells in Spleen or PBMC								% mCD19+ T cells in Spleen or PBMC
	Spleen			PBMC					Spleen			PBMC
	CD4m/m	CD4m/h	CD4h/h	CD4m/m	CD4m/h	CD4h/h			CD4m/m	CD4m/h	CD4h/h	CD4m/m	CD4m/h	CD4h/h
	39	32.6	34.1	23	20.7	18.6			50.8	45	48.1	56.9	59.6	60.4
	41	43.9	36	21.8	20.9	19.5			48.9	43.6	54.3	60.1	55.5	54.4
	38.2	35.8	39.3	24.1	17.1	17.6			48.1	51.6	47.9	54.9	59.8	63.9
	34.5	33.8	29.8	18.8	16.8	20.2			53.7	45.1	49	62.3	61.7	56.1
	32.3	35.3	38.4	22	17.5	20.7			59.1	42.6	46	56.7	63.4	56.6
	31.5	37.5	41.7	19.3	21.2	20.4			60.1	51.5	47.3	57.2	52.5	57.3
	37.6	44.4	42.8	20	21.7	24.5			55.3	47	47.7	57.4	56.5	57.2
Mean	36.3	37.6143	37.4429	21.2857	19.4143	20.2143		Mean	53.7143	46.6286	48.6143	57.9286	58.4286	57.9857
SD	3.58143	4.7242	4.52506	1.9752	2.1652	2.18283		SD	4.75199	3.628	2.6661	2.46219	3.78845	3.1683
	p-value (m/m vs. m/h)		0.7503	p-value (m/m vs. m/h)		0.5615			p-value (m/m vs. m/h)		0.0016	p-value (m/m vs. m/h)		0.9613
	p-value (m/m vs. h/h)		0.8043	p-value (m/m vs. h/h)		0.8257			p-value (m/m vs. h/h)		0.0258	p-value (m/m vs. h/h)		0.9995
	p-value (m/h vs. h/h)		0.9951	p-value (m/h vs. h/h)		0.8985			p-value (m/h vs. h/h)		0.5429	p-value (m/h vs. h/h)		0.9695
	Fig 5E								Fig 5F
	% mCD3+mCD4-D1+ cells in Spleen or PBMC								% mCD3+mCD4-D3+ cells in Spleen or PBMC
	Spleen			PBMC					Spleen			PBMC
	CD4m/m	CD4m/h	CD4h/h	CD4m/m	CD4m/h	CD4h/h			CD4m/m	CD4m/h	CD4h/h	CD4m/m	CD4m/h	CD4h/h
	58	53.36	48.4	52.1	48.499	35.8			57.2	53.6	48.7	51.9	48.3	35.6
	59.9	52.99	48.7	49.5	45.93	37.3			58.8	53.3	48.6	49.3	46.8	37.2
	60.9	53.54	50.3	52.8	44.273	41.1			58.6	53.6	50.7	52.7	44.1	40.9
	61.2	54.42	47.9	49.7	45.6677	40.3			60	54.4	49.9	49.5	45.5	40.1
	61.1	54.88	46.3	53.4	45.755	40.2			59.8	55	46.8	53.2	45.6	40.1
	55.3	55.17	48.1	49.8	47.628	38.2			55.2	55.3	48.1	49.6	47.5	38
	58.5	54.36	50.6	51.4	45.68	40.8			58.4	54.4	50.6	51.3	45.5	40.7
Mean	59.2714	54.1029	48.6143	51.2429	46.2047	39.1		Mean	58.2857	54.2286	49.0571	51.0714	46.1857	38.9429
SD	2.16388	0.818183	1.47018	1.59881	1.40608	2.0199		SD	1.64866	0.758758	1.42227	1.61732	1.42645	2.02884
	p-value (m/m vs. m/h)		<0.0001	p-value (m/m vs. m/h)		<0.0001			p-value (m/m vs. m/h)		<0.0001	p-value (m/m vs. m/h)		<0.0001
	p-value (m/m vs. h/h)		<0.0001	p-value (m/m vs. h/h)		<0.0001			p-value (m/m vs. h/h)		<0.0001	p-value (m/m vs. h/h)		<0.0001
	p-value (m/h vs. h/h)		<0.0001	p-value (m/h vs. h/h)		<0.0001			p-value (m/h vs. h/h)		<0.0001	p-value (m/h vs. h/h)		<0.0001
	Fig 5F								Fig 5F
	% mCD3+mCD8+ cells in Spleen or PBMC								mCD3+mCD4-D3+/mCD3+mCD8+ Ratio
	Spleen			PBMC					Spleen			PBMC
	CD4m/m	CD4m/h	CD4h/h	CD4m/m	CD4m/h	CD4h/h			CD4m/m	CD4m/h	CD4h/h	CD4m/m	CD4m/h	CD4h/h
	36.5	39.3	45.8	39.7	47.1	51.8			1.56712	1.36387	1.06332	1.30731	1.02548	0.68726
	36.1	41.5	46.4	42.7	44.8	51.7			1.62881	1.28434	1.04741	1.15457	1.04464	0.71954
	35.8	41.7	44.3	39.2	46.9	50.4			1.63687	1.28537	1.14447	1.34439	0.9403	0.81151
	35.7	41.4	44.5	44.6	46.3	50.3			1.68067	1.31401	1.12135	1.10987	0.98272	0.79722
	35.9	40.8	46.9	39	44.6	53.2			1.66574	1.34804	0.99787	1.3641	1.02242	0.75376
	40.3	40.3	46.4	40.5	45.2	53.6			1.36973	1.37221	1.03664	1.22469	1.05089	0.70896
	37.5	41.4	44.3	39	44.9	51.1			1.55733	1.31401	1.14221	1.31539	1.01336	0.79648
Mean	36.8286	40.9143	45.5143	40.6714	45.6857	51.7286		Mean	1.58661	1.32598	1.07904	1.26005	1.0114	0.753533
SD	1.64996	0.859125	1.12165	2.1708	1.05424	1.28285		SD	0.106215	0.0358913	0.0572939	0.0984599	0.0384396	0.0494111
	p-value (m/m vs. m/h)		<0.0001	p-value (m/m vs. m/h)		<0.0001			p-value (m/m vs. m/h)		<0.0001	p-value (m/m vs. m/h)		<0.0001
	p-value (m/m vs. h/h)		<0.0001	p-value (m/m vs. h/h)		<0.0001			p-value (m/m vs. h/h)		<0.0001	p-value (m/m vs. h/h)		<0.0001
	p-value (m/h vs. h/h)		<0.0001	p-value (m/h vs. h/h)		<0.0001			p-value (m/h vs. h/h)		<0.0001	p-value (m/h vs. h/h)		<0.0001
	Fig 5G								Fig 5G
	% mCD3+mCD4-D3+ Naïve cells in Spleen or PBMC								% mCD3+mCD4-D3+ CM cells in Spleen or PBMC
	Spleen			PBMC					Spleen			PBMC
	CD4m/m	CD4m/h	CD4h/h	CD4m/m	CD4m/h	CD4h/h			CD4m/m	CD4m/h	CD4h/h	CD4m/m	CD4m/h	CD4h/h
	79.7	70.5	80	53.9	65.6	47.7			2.6	4.34	3.47	0.64	0.61	1.25
	77.3	79.1	80	63.5	67.5	57.3			2.94	3.2	3.04	0.66	0.78	0.96
	80.2	58	79.4	52.8	52.2	48.2			2.67	2.9	3.23	0.52	1.17	0.62
	77	79.9	80.1	67.4	58.9	57.3			2.2	3.3	3.12	0.97	0.74	1
	52.5	79.3	76.7	70.6	61.6	58.4			1.51	3.42	3.18	0.62	1.01	0.54
	45.3	77.2	78.5	56.3	60.2	55.5			1	3.8	3.45	1.17	0.75	0.78
	51	75.6	78.9	72.8	63.8	66.6			1.79	4.35	3.07	1.01	0.89	0.98
Mean	66.1429	74.2286	79.0857	62.4714	61.4	55.8571		Mean	2.10143	3.61571	3.22286	0.798571	0.85	0.875714
SD	15.6717	7.84851	1.21577	8.1975	5.04942	6.47221		SD	0.700558	0.565799	0.174137	0.246943	0.188944	0.245211
	p-value (m/m vs. m/h)		0.1975	p-value (m/m vs. m/h)		0.9705			p-value (m/m vs. m/h)		<0.0001	p-value (m/m vs. m/h)		0.9698
	p-value (m/m vs. h/h)		0.0208	p-value (m/m vs. h/h)		0.3318			p-value (m/m vs. h/h)		<0.0001	p-value (m/m vs. h/h)		0.9334
	p-value (m/h vs. h/h)		0.5464	p-value (m/h vs. h/h)		0.4571			p-value (m/h vs. h/h)		0.1833	p-value (m/h vs. h/h)		0.9924
	Fig 5G								Fig 5H
	% mCD3+mCD4-D3+ EM cells in Spleen or PBMC								% mCD3+mCD8+ Naïve cells in Spleen or PBMC
	Spleen			PBMC					Spleen			PBMC
	CD4m/m	CD4m/h	CD4h/h	CD4m/m	CD4m/h	CD4h/h			CD4m/m	CD4m/h	CD4h/h	CD4m/m	CD4m/h	CD4h/h
	11.2	15.9	10.5	3.21	4.82	4.58			84.7	81	81.5	78.3	79.7	68.7
	11.6	9.8	10.4	3.37	4.04	3.8			85.3	85.5	82.2	75.5	75.9	72.8
	10.1	12	10.8	3.39	4.39	4.95			85.7	74.2	83.3	70	71.8	65.8
	10.8	9.6	9.42	3.29	3.56	3.72			83.7	83.3	82.2	72	72.9	71.8
	8.18	8.96	11.6	2.28	3.35	3.15			69	80.4	81.6	78.3	74.2	77.8
	11.2	10.7	11.6	4.06	3.69	3.94			60.5	83.7	85.9	68.8	81.6	74.7
	11.9	12.2	10.6	3.89	4.09	2.84			65	85.3	86.8	75.9	81.4	80
Mean	10.7114	11.3086	10.7029	3.35571	3.99143	3.85429		Mean	76.2714	81.9143	83.3571	74.1143	76.7857	73.0857
SD	1.25628	2.36062	0.753696	0.572359	0.50759	0.739411		SD	10.9947	3.91724	2.14232	3.86843	4.09041	4.9445
	p-value (m/m vs. m/h)		0.6315	p-value (m/m vs. m/h)		0.5945			p-value (m/m vs. m/h)		0.1704	p-value (m/m vs. m/h)		0.661
	p-value (m/m vs. h/h)		>0.9999	p-value (m/m vs. h/h)		0.7248			p-value (m/m vs. h/h)		0.0666	p-value (m/m vs. h/h)		0.9398
	p-value (m/h vs. h/h)		0.6233	p-value (m/h vs. h/h)		0.9757			p-value (m/h vs. h/h)		0.8852	p-value (m/h vs. h/h)		0.4562
	Fig 5H								Fig 5H
	% mCD3+mCD8+ CM cells in Spleen or PBMC								% mCD3+mCD8+ EM cells in Spleen or PBMC
	Spleen			PBMC					Spleen			PBMC
	CD4m/m	CD4m/h	CD4h/h	CD4m/m	CD4m/h	CD4h/h			CD4m/m	CD4m/h	CD4h/h	CD4m/m	CD4m/h	CD4h/h
	8.18	10.9	13.4	8.57	8.17	12.9			1.56712	1.36387	1.06332	1.30731	1.02548	0.68726
	7.91	8.4	12.3	9.68	17	12.9			1.62881	1.28434	1.04741	1.15457	1.04464	0.71954
	8.62	12.3	10.8	7.77	10.6	14.2			1.63687	1.28537	1.14447	1.34439	0.9403	0.81151
	9.13	9.58	11.7	15.4	15.1	7.23			1.68067	1.31401	1.12135	1.10987	0.98272	0.79722
	9.14	12.1	9.24	12.6	6.85	8.6			1.66574	1.34804	0.99787	1.3641	1.02242	0.75376
	7.83	7.95	9.14	15.8	7.38	9.6			1.36973	1.37221	1.03664	1.22469	1.05089	0.70896
	8.35	8.46	7.95	13.5	7.36	12.9			1.55733	1.31401	1.14221	1.31539	1.01336	0.79648
Mean	8.45143	9.95571	10.6471	11.9029	10.3514	11.19		Mean	1.58661	1.32598	1.07904	1.26005	1.0114	0.753533
SD	0.53639	1.8169	1.95653	3.25536	4.11523	2.66928		SD	0.106215	0.0358913	0.0572939	0.0984599	0.0384396	0.0494111
	p-value (m/m vs. m/h)		0.188	p-value (m/m vs. m/h)		0.6752			p-value (m/m vs. m/h)		0.3656	p-value (m/m vs. m/h)		0.9978
	p-value (m/m vs. h/h)		0.0651	p-value (m/m vs. h/h)		0.919			p-value (m/m vs. h/h)		0.0585	p-value (m/m vs. h/h)		0.7516
	p-value (m/h vs. h/h)		0.8685	p-value (m/h vs. h/h)		0.8899			p-value (m/h vs. h/h)		0.5812	p-value (m/h vs. h/h)		0.7879

## Sheet: Fig 6A-C.
	Fig 6A. T cell activation
	mCD4-D3+CD44+						mCD8+CD44+
	Control			Anti-CD3/28			Control			Anti-CD3/28
	CD4m/m	CD4m/h	CD4h/h	CD4m/m	CD4m/h	CD4h/h	CD4m/m	CD4m/h	CD4h/h	CD4m/m	CD4m/h	CD4h/h
	25.7	36.3	42.9	98.5	97.2	99	38	59.3	56.1	94.1	91.9	99
	27.2	25	41.8	96.6	97.9	97.9	55.8	53.1	62.6	98.8	98.5	93.5
	39.3	40.5	53.6	98.3	95.2	98.3	68.1	43.5	62.4	93.8	87.8	99.1
	45	34.2	40.9	97.2	95.1	98.8	58.8	44.6	56.5	97.7	98.6	99.3
	52.4	36.8	44.1	98	97	95.7	35.3	38.5	42.5	95.8	92	87
Mean	37.92	34.56	44.66	97.72	96.48	97.94	51.2	47.8	56.02	96.04	93.76	95.58
SD	11.4668	5.80629	5.13936	0.798123	1.25976	1.32401	14.0675	8.3	8.1705	2.19157	4.68967	5.3821
				p-value (m/m vs. m/h)		0.9812				p-value (m/m vs. m/h)		0.9602
				p-value (m/m vs. h/h)		0.9999				p-value (m/m vs. h/h)		0.9996
				p-value (m/h vs. h/h)		0.9701				p-value (m/h vs. h/h)		0.979
	Fig 6A. T cell activation
	mCD4-D3+CD25+						mCD8+CD25+
	Control			Anti-CD3/28			Control			Anti-CD3/28
	CD4m/m	CD4m/h	CD4h/h	CD4m/m	CD4m/h	CD4h/h	CD4m/m	CD4m/h	CD4h/h	CD4m/m	CD4m/h	CD4h/h
	2.47	2.66	0.99	96.3	94.2	96.8	3	7.14	0.7	94.4	93.2	99.3
	3.45	1.93	2.25	99.6	99	93.2	1.08	3.4	1.14	99.9	99.6	93.8
	1.56	1.6	1.17	93.7	89.1	96.7	4.17	0.63	2.17	92.7	87.5	99.4
	2.46	7.11	1.36	97.8	99.7	98	4.76	0.95	3.35	97.9	99.9	99.6
	1.47	2.99	2.02	94.1	94.2	89.9	0.86	2.06	1.42	94.7	90.1	85.4
Mean	2.282	3.258	1.558	96.3	95.24	94.92	2.774	2.836	1.756	95.92	94.06	95.5
SD	0.808066	2.22373	0.54879	2.48697	4.29802	3.32971	1.76615	2.63951	1.0392	2.91239	5.57342	6.15142
				p-value (m/m vs. m/h)		0.8966				p-value (m/m vs. m/h)		0.8349
				p-value (m/m vs. h/h)		0.8005				p-value (m/m vs. h/h)		0.9975
				p-value (m/h vs. h/h)		0.9966				p-value (m/h vs. h/h)		0.9142
	Fig 6B. T cell proliferation
	mCD4-D3+			mCD8+
	CD4m/m	CD4m/h	CD4h/h	CD4m/m	CD4m/h	CD4h/h
	74.9	69.6	90.4	75.9	76.9	98.2
	72.1	96.9	62.1	99.6	99	78.6
	98.4	64.1	92.9	77.7	68.1	98.5
	70.6	98.6	90.7	89.9	99.8	98.5
	79.5	56.2	60.4	84.5	57.4	65.4
Mean	79.1	77.08	79.3	85.52	80.24	87.84
SD	11.3086	19.4702	16.5165	9.64583	18.8065	15.1948
	p-value (m/m vs. m/h)		0.9959	p-value (m/m vs. m/h)		0.9346
	p-value (m/m vs. h/h)		>0.9999	p-value (m/m vs. h/h)		0.9938
	p-value (m/h vs. h/h)		0.9945	p-value (m/h vs. h/h)		0.832
	Fig 6C. Interferon-γ
	CD4m/m	CD4m/h	CD4h/h
	2983.2	1966.8	7626.4
	8966.5	2395.8	3101.4
	3578.3	7305	8334.5
	2213.1	2403	8143.9
	1473	11429	1193.3
Mean	3842.82	5099.92	5679.9
SD	2972.08	4162.98	3304.74
	p-value (m/m vs. m/h)		0.8929
	p-value (m/m vs. h/h)		0.7043
	p-value (m/h vs. h/h)		0.9785
